# Supplementary material for: The Lipid A from the Haloalkaliphilic Bacterium Salinivibrio sharmensis Strain BAGT
Source: MDPI journal article supplement (doi:10.3390/md11010184), 2013-01-21
Supplement: s1 [file s1]

marinedrugs-11-00184-s001.mol
  corina  07071423173D 1   1.00000     0.00000 
CORINA 3.49 0023  12.04.2013
119120  0  0  0  0  0  0  0  0999 V2000
   -1.2203    2.7082   -0.6496 C   0  0  0  0  0  0  0  0  0  0  0  0
    0.2057    2.7373   -0.0910 C   0  0  0  0  0  0  0  0  0  0  0  0
    0.4211    1.5053    0.7934 C   0  0  0  0  0  0  0  0  0  0  0  0
    0.1442    0.2429   -0.0274 C   0  0  0  0  0  0  0  0  0  0  0  0
   -1.1876    0.2941   -0.5429 O   0  0  0  0  0  0  0  0  0  0  0  0
   -1.4337    1.3994   -1.4146 C   0  0  0  0  0  0  0  0  0  0  0  0
    1.9753   -3.4385   -1.6452 C   0  0  0  0  0  0  0  0  0  0  0  0
    3.0010   -4.3479   -0.9616 C   0  0  0  0  0  0  0  0  0  0  0  0
    4.3976   -3.7420   -1.1316 C   0  0  0  0  0  0  0  0  0  0  0  0
    4.4035   -2.3236   -0.5555 C   0  0  0  0  0  0  0  0  0  0  0  0
    3.4062   -1.5395   -1.2134 O   0  0  0  0  0  0  0  0  0  0  0  0
    2.0748   -2.0319   -1.0492 C   0  0  0  0  0  0  0  0  0  0  0  0
    1.0722    0.1662   -1.1113 O   0  0  0  0  0  0  0  0  0  0  0  0
    1.1574    2.7205   -1.1875 O   0  0  0  0  0  0  0  0  0  0  0  0
    2.2455   -3.3833   -3.0473 O   0  0  0  0  0  0  0  0  0  0  0  0
    1.4626    3.9015   -1.7477 C   0  0  0  0  0  0  0  0  0  0  0  0
    2.3524    3.9515   -2.9629 C   0  0  0  0  0  0  0  0  0  0  0  0
    3.7927    4.2316   -2.5292 C   0  0  0  0  0  0  0  0  0  0  0  0
    4.7151    4.1614   -3.7479 C   0  0  0  0  0  0  0  0  0  0  0  0
    3.8714    5.5555   -1.9382 O   0  0  0  0  0  0  0  0  0  0  0  0
    1.0238    4.9244   -1.2777 O   0  0  0  0  0  0  0  0  0  0  0  0
    6.1688    4.3176   -3.2969 C   0  0  0  0  0  0  0  0  0  0  0  0
    7.0912    4.2475   -4.5155 C   0  0  0  0  0  0  0  0  0  0  0  0
    8.5448    4.4036   -4.0645 C   0  0  0  0  0  0  0  0  0  0  0  0
    9.4672    4.3335   -5.2832 C   0  0  0  0  0  0  0  0  0  0  0  0
   10.9209    4.4897   -4.8322 C   0  0  0  0  0  0  0  0  0  0  0  0
   11.8433    4.4195   -6.0508 C   0  0  0  0  0  0  0  0  0  0  0  0
   13.2970    4.5757   -5.5998 C   0  0  0  0  0  0  0  0  0  0  0  0
   14.2194    4.5055   -6.8185 C   0  0  0  0  0  0  0  0  0  0  0  0
    3.8410    5.6274   -0.5982 C   0  0  0  0  0  0  0  0  0  0  0  0
    3.7971    6.9707    0.0835 C   0  0  0  0  0  0  0  0  0  0  0  0
    3.7689    6.7722    1.6003 C   0  0  0  0  0  0  0  0  0  0  0  0
    3.7243    8.1360    2.2924 C   0  0  0  0  0  0  0  0  0  0  0  0
    3.6961    7.9375    3.8092 C   0  0  0  0  0  0  0  0  0  0  0  0
    3.6515    9.3013    4.5013 C   0  0  0  0  0  0  0  0  0  0  0  0
    3.6232    9.1028    6.0181 C   0  0  0  0  0  0  0  0  0  0  0  0
    3.5787   10.4666    6.7102 C   0  0  0  0  0  0  0  0  0  0  0  0
    3.8489    4.6152    0.0615 O   0  0  0  0  0  0  0  0  0  0  0  0
    3.5504   10.2681    8.2270 C   0  0  0  0  0  0  0  0  0  0  0  0
    3.5058   11.6319    8.9191 C   0  0  0  0  0  0  0  0  0  0  0  0
    3.4776   11.4334   10.4359 C   0  0  0  0  0  0  0  0  0  0  0  0
    3.4330   12.7972   11.1279 C   0  0  0  0  0  0  0  0  0  0  0  0
    1.8049    1.4833    1.2736 N   0  0  0  0  0  0  0  0  0  0  0  0
    2.1115    0.8374    2.4161 C   0  0  0  0  0  0  0  0  0  0  0  0
    3.5351    0.8147    2.9102 C   0  0  0  0  0  0  0  0  0  0  0  0
    1.2418    0.2744    3.0466 O   0  0  0  0  0  0  0  0  0  0  0  0
    3.6090    0.0213    4.2163 C   0  0  0  0  0  0  0  0  0  0  0  0
    5.0699   -0.1080    4.6524 C   0  0  0  0  0  0  0  0  0  0  0  0
    2.8559    0.7138    5.2466 O   0  0  0  0  0  0  0  0  0  0  0  0
    5.1555   -1.0054    5.8886 C   0  0  0  0  0  0  0  0  0  0  0  0
    6.6163   -1.1348    6.3247 C   0  0  0  0  0  0  0  0  0  0  0  0
    6.7019   -2.0321    7.5610 C   0  0  0  0  0  0  0  0  0  0  0  0
    8.1628   -2.1615    7.9971 C   0  0  0  0  0  0  0  0  0  0  0  0
    8.2484   -3.0589    9.2333 C   0  0  0  0  0  0  0  0  0  0  0  0
    9.7092   -3.1882    9.6694 C   0  0  0  0  0  0  0  0  0  0  0  0
    9.7948   -4.0856   10.9056 C   0  0  0  0  0  0  0  0  0  0  0  0
   11.2557   -4.2149   11.3418 C   0  0  0  0  0  0  0  0  0  0  0  0
   11.3413   -5.1123   12.5780 C   0  0  0  0  0  0  0  0  0  0  0  0
   12.8021   -5.2417   13.0141 C   0  0  0  0  0  0  0  0  0  0  0  0
    2.2912   -0.0425    6.2010 C   0  0  0  0  0  0  0  0  0  0  0  0
    1.4942    0.6062    7.3032 C   0  0  0  0  0  0  0  0  0  0  0  0
    2.4220   -1.2434    6.1763 O   0  0  0  0  0  0  0  0  0  0  0  0
    0.9642   -0.4713    8.2514 C   0  0  0  0  0  0  0  0  0  0  0  0
    0.1550    0.1873    9.3705 C   0  0  0  0  0  0  0  0  0  0  0  0
   -0.3749   -0.8902   10.3187 C   0  0  0  0  0  0  0  0  0  0  0  0
   -1.1841   -0.2316   11.4378 C   0  0  0  0  0  0  0  0  0  0  0  0
   -1.7140   -1.3091   12.3860 C   0  0  0  0  0  0  0  0  0  0  0  0
   -2.5232   -0.6505   13.5051 C   0  0  0  0  0  0  0  0  0  0  0  0
   -3.0532   -1.7280   14.4533 C   0  0  0  0  0  0  0  0  0  0  0  0
   -3.8624   -1.0694   15.5723 C   0  0  0  0  0  0  0  0  0  0  0  0
   -4.3923   -2.1469   16.5205 C   0  0  0  0  0  0  0  0  0  0  0  0
   -5.2015   -1.4883   17.6396 C   0  0  0  0  0  0  0  0  0  0  0  0
   -5.7314   -2.5658   18.5878 C   0  0  0  0  0  0  0  0  0  0  0  0
   -6.5406   -1.9072   19.7069 C   0  0  0  0  0  0  0  0  0  0  0  0
    2.6876   -4.4570    0.4520 O   0  0  0  0  0  0  0  0  0  0  0  0
    1.8652   -5.4524    0.8187 C   0  0  0  0  0  0  0  0  0  0  0  0
    1.4948   -5.6281    2.2689 C   0  0  0  0  0  0  0  0  0  0  0  0
    0.5535   -6.8256    2.4134 C   0  0  0  0  0  0  0  0  0  0  0  0
    0.2767   -7.0807    3.8964 C   0  0  0  0  0  0  0  0  0  0  0  0
   -0.5623   -8.3512    4.0474 C   0  0  0  0  0  0  0  0  0  0  0  0
   -0.8391   -8.6063    5.5304 C   0  0  0  0  0  0  0  0  0  0  0  0
   -1.6780   -9.8768    5.6814 C   0  0  0  0  0  0  0  0  0  0  0  0
    1.4218   -6.2075   -0.0138 O   0  0  0  0  0  0  0  0  0  0  0  0
   -0.6761   -6.5489    1.7400 O   0  0  0  0  0  0  0  0  0  0  0  0
   -1.9549  -10.1319    7.1644 C   0  0  0  0  0  0  0  0  0  0  0  0
   -2.7938  -11.4024    7.3154 C   0  0  0  0  0  0  0  0  0  0  0  0
   -3.0706  -11.6575    8.7984 C   0  0  0  0  0  0  0  0  0  0  0  0
   -3.9096  -12.9280    8.9494 C   0  0  0  0  0  0  0  0  0  0  0  0
   -4.1864  -13.1831   10.4324 C   0  0  0  0  0  0  0  0  0  0  0  0
    1.0949   -1.1026   -1.7684 C   0  0  0  0  0  0  0  0  0  0  0  0
    5.3781   -4.5642   -0.4183 N   0  0  0  0  0  0  0  0  0  0  0  0
    6.6695   -4.5591   -0.8037 C   0  0  0  0  0  0  0  0  0  0  0  0
    7.6782   -5.4049   -0.0700 C   0  0  0  0  0  0  0  0  0  0  0  0
    7.0200   -3.8739   -1.7410 O   0  0  0  0  0  0  0  0  0  0  0  0
    9.0582   -5.2175   -0.7035 C   0  0  0  0  0  0  0  0  0  0  0  0
   10.1031   -5.9772    0.1162 C   0  0  0  0  0  0  0  0  0  0  0  0
    9.0415   -5.7232   -2.0399 O   0  0  0  0  0  0  0  0  0  0  0  0
   11.4978   -5.6893   -0.4430 C   0  0  0  0  0  0  0  0  0  0  0  0
   12.5428   -6.4490    0.3768 C   0  0  0  0  0  0  0  0  0  0  0  0
   13.9375   -6.1610   -0.1824 C   0  0  0  0  0  0  0  0  0  0  0  0
   14.9824   -6.9207    0.6373 C   0  0  0  0  0  0  0  0  0  0  0  0
   16.3772   -6.6328    0.0781 C   0  0  0  0  0  0  0  0  0  0  0  0
   17.4221   -7.3925    0.8979 C   0  0  0  0  0  0  0  0  0  0  0  0
   18.8168   -7.1046    0.3387 C   0  0  0  0  0  0  0  0  0  0  0  0
   19.8617   -7.8643    1.1584 C   0  0  0  0  0  0  0  0  0  0  0  0
   21.2565   -7.5764    0.5992 C   0  0  0  0  0  0  0  0  0  0  0  0
   22.3014   -8.3361    1.4190 C   0  0  0  0  0  0  0  0  0  0  0  0
    5.6876   -1.7312   -0.7608 O   0  0  0  0  0  0  0  0  0  0  0  0
    6.3230   -0.6451    0.2435 P   0  0  0  0  0  0  0  0  0  0  0  0
    6.3259   -1.1885    1.6201 O   0  0  0  0  0  0  0  0  0  0  0  0
    7.8333   -0.3165   -0.2070 O   0  0  0  0  0  0  0  0  0  0  0  0
    5.4447    0.7036    0.2009 O   0  0  0  0  0  0  0  0  0  0  0  0
   -2.1566    2.7904    0.4267 O   0  0  0  0  0  0  0  0  0  0  0  0
   -3.2377    3.9759    0.5599 P   0  0  0  0  0  0  0  0  0  0  0  0
   -2.5433    5.2825    0.5299 O   0  0  0  0  0  0  0  0  0  0  0  0
   -4.2787    3.8931   -0.6655 O   0  0  0  0  0  0  0  0  0  0  0  0
   -4.0333    3.8229    1.9512 O   0  0  0  0  0  0  0  0  0  0  0  0
   -2.8747    1.3358   -1.9248 C   0  0  0  0  0  0  0  0  0  0  0  0
   -3.0422    0.1708   -2.7352 O   0  0  0  0  0  0  0  0  0  0  0  0
  4  5  1  0      
  5  6  1  0      
  6  1  1  0      
 10 11  1  0      
 11 12  1  0      
 12  7  1  0      
  4 13  1  0      
  2 14  1  0      
  7 15  1  0      
 14 16  1  0      
 16 17  1  0      
 17 18  1  0      
 18 19  1  0      
 18 20  1  0      
 16 21  2  0      
 19 22  1  0      
 22 23  1  0      
 23 24  1  0      
 24 25  1  0      
 25 26  1  0      
 26 27  1  0      
 27 28  1  0      
 28 29  1  0      
 20 30  1  0      
 30 31  1  0      
 31 32  1  0      
 32 33  1  0      
 33 34  1  0      
 34 35  1  0      
 35 36  1  0      
 36 37  1  0      
 30 38  2  0      
 37 39  1  0      
 39 40  1  0      
 40 41  1  0      
 41 42  1  0      
  3 43  1  0      
 43 44  1  0      
 44 45  1  0      
 44 46  2  0      
 45 47  1  0      
 47 48  1  0      
 47 49  1  0      
 48 50  1  0      
 50 51  1  0      
 51 52  1  0      
 52 53  1  0      
 53 54  1  0      
 54 55  1  0      
 55 56  1  0      
 56 57  1  0      
 57 58  1  0      
 58 59  1  0      
 49 60  1  0      
 60 61  1  0      
 60 62  2  0      
 61 63  1  0      
 63 64  1  0      
 64 65  1  0      
 65 66  1  0      
 66 67  1  0      
 67 68  1  0      
 68 69  1  0      
 69 70  1  0      
 70 71  1  0      
 71 72  1  0      
 72 73  1  0      
 73 74  1  0      
  8 75  1  0      
 75 76  1  0      
 76 77  1  0      
 77 78  1  0      
 78 79  1  0      
 79 80  1  0      
 80 81  1  0      
 81 82  1  0      
 76 83  2  0      
 78 84  1  0      
 82 85  1  0      
 85 86  1  0      
 86 87  1  0      
 87 88  1  0      
 88 89  1  0      
 12 90  1  0      
 13 90  1  0      
  9 91  1  0      
 91 92  1  0      
 92 93  1  0      
 92 94  2  0      
 93 95  1  0      
 95 96  1  0      
 95 97  1  0      
 96 98  1  0      
 98 99  1  0      
 99100  1  0      
100101  1  0      
101102  1  0      
102103  1  0      
103104  1  0      
104105  1  0      
105106  1  0      
106107  1  0      
  1  2  1  0      
  3  2  1  0      
  4  3  1  0      
  7  8  1  0      
  9  8  1  0      
 10  9  1  0      
 10108  1  0      
108109  1  0      
109110  2  0      
109111  1  0      
109112  1  0      
  1113  1  0      
113114  1  0      
114115  2  0      
114116  1  0      
114117  1  0      
  6118  1  0      
118119  1  0      
M  STY  1   1 SUP
M  SLB  1   1   1
M  SAL   1  5 108 109 110 111 112
M  SBL   1  1 109
M  SMT   1 OPO3H2
M  SBV   1109   -6.9258    7.5257
M  STY  1   2 SUP
M  SLB  1   2   2
M  SAL   2  5 113 114 115 116 117
M  SBL   2  1 114
M  SMT   2 OPO3H2
M  SBV   2114   -7.8788    8.1088
M  STY  1   3 SUP
M  SLB  1   3   3
M  SAL   3  2 118 119
M  SBL   3  1 119
M  SMT   3 CH2OH
M  SBV   3119   -7.2699    8.7351
M  END
$$$$
