# Supplementary material for: The Lipid A from the Haloalkaliphilic Bacterium Salinivibrio sharmensis Strain BAGT
Source: MDPI journal article supplement (doi:10.3390/md11010184), 2013-01-21
Supplement: s2 [file s2]

marinedrugs-11-00184-s001.mol
  ChemDraw06021422342D

119120  0  0  0  0  0  0  0  0999 V2000
   -1.5832    5.9792    0.0000 C   0  0  0  0  0  0  0  0  0  0  0  0
   -1.1707    5.2647    0.0000 C   0  0  0  0  0  0  0  0  0  0  0  0
   -0.3726    5.4738    0.0000 C   0  0  0  0  0  0  0  0  0  0  0  0
    0.4207    5.2647    0.0000 C   0  0  0  0  0  0  0  0  0  0  0  0
    0.0082    5.9792    0.0000 O   0  0  0  0  0  0  0  0  0  0  0  0
   -0.7899    5.7702    0.0000 C   0  0  0  0  0  0  0  0  0  0  0  0
    2.4387    4.9686    0.0000 C   0  0  0  0  0  0  0  0  0  0  0  0
    2.8512    4.2541    0.0000 C   0  0  0  0  0  0  0  0  0  0  0  0
    3.6493    4.4632    0.0000 C   0  0  0  0  0  0  0  0  0  0  0  0
    4.4425    4.2541    0.0000 C   0  0  0  0  0  0  0  0  0  0  0  0
    4.0301    4.9686    0.0000 O   0  0  0  0  0  0  0  0  0  0  0  0
    3.2320    4.7595    0.0000 C   0  0  0  0  0  0  0  0  0  0  0  0
    1.4905    5.6685    0.0000 O   0  0  0  0  0  0  0  0  0  0  0  0
   -1.9675    5.4782    0.0000 O   0  0  0  0  0  0  0  0  0  0  0  0
    1.7243    4.5561    0.0000 O   0  0  0  0  0  0  0  0  0  0  0  0
   -2.3800    4.7638    0.0000 C   0  0  0  0  0  0  0  0  0  0  0  0
   -1.9675    4.0493    0.0000 C   0  0  0  0  0  0  0  0  0  0  0  0
   -2.3800    3.3348    0.0000 C   0  0  0  0  0  0  0  0  0  0  0  0
   -1.9675    2.6203    0.0000 C   0  0  0  0  0  0  0  0  0  0  0  0
   -3.2050    3.3348    0.0000 O   0  0  0  0  0  0  0  0  0  0  0  0
   -3.2050    4.7638    0.0000 O   0  0  0  0  0  0  0  0  0  0  0  0
   -2.3800    1.9059    0.0000 C   0  0  0  0  0  0  0  0  0  0  0  0
   -2.1665    1.1090    0.0000 C   0  0  0  0  0  0  0  0  0  0  0  0
   -2.5790    0.3945    0.0000 C   0  0  0  0  0  0  0  0  0  0  0  0
   -2.1665   -0.3200    0.0000 C   0  0  0  0  0  0  0  0  0  0  0  0
   -2.5790   -1.0344    0.0000 C   0  0  0  0  0  0  0  0  0  0  0  0
   -2.1665   -1.7489    0.0000 C   0  0  0  0  0  0  0  0  0  0  0  0
   -2.5790   -2.4634    0.0000 C   0  0  0  0  0  0  0  0  0  0  0  0
   -2.3655   -3.2603    0.0000 C   0  0  0  0  0  0  0  0  0  0  0  0
   -3.6175    2.6203    0.0000 C   0  0  0  0  0  0  0  0  0  0  0  0
   -3.2050    1.9059    0.0000 C   0  0  0  0  0  0  0  0  0  0  0  0
   -3.6175    1.1914    0.0000 C   0  0  0  0  0  0  0  0  0  0  0  0
   -3.2050    0.4769    0.0000 C   0  0  0  0  0  0  0  0  0  0  0  0
   -3.6175   -0.2375    0.0000 C   0  0  0  0  0  0  0  0  0  0  0  0
   -3.2050   -0.9520    0.0000 C   0  0  0  0  0  0  0  0  0  0  0  0
   -3.6175   -1.6665    0.0000 C   0  0  0  0  0  0  0  0  0  0  0  0
   -3.4040   -2.4634    0.0000 C   0  0  0  0  0  0  0  0  0  0  0  0
   -4.4425    2.6203    0.0000 O   0  0  0  0  0  0  0  0  0  0  0  0
   -3.8165   -3.1778    0.0000 C   0  0  0  0  0  0  0  0  0  0  0  0
   -3.4040   -3.8923    0.0000 C   0  0  0  0  0  0  0  0  0  0  0  0
   -3.8165   -4.6068    0.0000 C   0  0  0  0  0  0  0  0  0  0  0  0
   -3.4040   -5.3212    0.0000 C   0  0  0  0  0  0  0  0  0  0  0  0
    0.3419    5.0613    0.0000 N   0  0  0  0  0  0  0  0  0  0  0  0
    0.1284    4.2644    0.0000 C   0  0  0  0  0  0  0  0  0  0  0  0
    0.5409    3.5499    0.0000 C   0  0  0  0  0  0  0  0  0  0  0  0
   -0.6966    4.2644    0.0000 O   0  0  0  0  0  0  0  0  0  0  0  0
    0.1284    2.8355    0.0000 C   0  0  0  0  0  0  0  0  0  0  0  0
    0.5409    2.1210    0.0000 C   0  0  0  0  0  0  0  0  0  0  0  0
   -0.6966    2.8355    0.0000 O   0  0  0  0  0  0  0  0  0  0  0  0
    0.1284    1.4065    0.0000 C   0  0  0  0  0  0  0  0  0  0  0  0
    0.5409    0.6921    0.0000 C   0  0  0  0  0  0  0  0  0  0  0  0
    0.1284   -0.0224    0.0000 C   0  0  0  0  0  0  0  0  0  0  0  0
    0.5409   -0.7369    0.0000 C   0  0  0  0  0  0  0  0  0  0  0  0
    0.1284   -1.4514    0.0000 C   0  0  0  0  0  0  0  0  0  0  0  0
    0.5409   -2.1658    0.0000 C   0  0  0  0  0  0  0  0  0  0  0  0
    0.1284   -2.8803    0.0000 C   0  0  0  0  0  0  0  0  0  0  0  0
    0.5409   -3.5948    0.0000 C   0  0  0  0  0  0  0  0  0  0  0  0
    0.1284   -4.3092    0.0000 C   0  0  0  0  0  0  0  0  0  0  0  0
    0.5409   -5.0237    0.0000 C   0  0  0  0  0  0  0  0  0  0  0  0
   -1.1091    2.1210    0.0000 C   0  0  0  0  0  0  0  0  0  0  0  0
   -0.6966    1.4065    0.0000 C   0  0  0  0  0  0  0  0  0  0  0  0
   -1.9341    2.1210    0.0000 O   0  0  0  0  0  0  0  0  0  0  0  0
   -1.1091    0.6921    0.0000 C   0  0  0  0  0  0  0  0  0  0  0  0
   -0.6966   -0.0224    0.0000 C   0  0  0  0  0  0  0  0  0  0  0  0
   -1.1091   -0.7369    0.0000 C   0  0  0  0  0  0  0  0  0  0  0  0
   -0.6966   -1.4514    0.0000 C   0  0  0  0  0  0  0  0  0  0  0  0
   -1.1091   -2.1658    0.0000 C   0  0  0  0  0  0  0  0  0  0  0  0
   -0.6966   -2.8803    0.0000 C   0  0  0  0  0  0  0  0  0  0  0  0
   -1.1091   -3.5948    0.0000 C   0  0  0  0  0  0  0  0  0  0  0  0
   -0.6966   -4.3092    0.0000 C   0  0  0  0  0  0  0  0  0  0  0  0
   -1.1091   -5.0237    0.0000 C   0  0  0  0  0  0  0  0  0  0  0  0
   -0.6966   -5.7382    0.0000 C   0  0  0  0  0  0  0  0  0  0  0  0
   -1.1091   -6.4527    0.0000 C   0  0  0  0  0  0  0  0  0  0  0  0
   -0.6966   -7.1671    0.0000 C   0  0  0  0  0  0  0  0  0  0  0  0
    2.0543    4.4676    0.0000 O   0  0  0  0  0  0  0  0  0  0  0  0
    1.8408    3.6707    0.0000 C   0  0  0  0  0  0  0  0  0  0  0  0
    2.4242    3.0874    0.0000 C   0  0  0  0  0  0  0  0  0  0  0  0
    1.8408    2.5040    0.0000 C   0  0  0  0  0  0  0  0  0  0  0  0
    2.2533    1.7895    0.0000 C   0  0  0  0  0  0  0  0  0  0  0  0
    1.8408    1.0751    0.0000 C   0  0  0  0  0  0  0  0  0  0  0  0
    2.2533    0.3606    0.0000 C   0  0  0  0  0  0  0  0  0  0  0  0
    1.8408   -0.3539    0.0000 C   0  0  0  0  0  0  0  0  0  0  0  0
    1.0158    3.6707    0.0000 O   0  0  0  0  0  0  0  0  0  0  0  0
    1.0158    2.5040    0.0000 O   0  0  0  0  0  0  0  0  0  0  0  0
    2.2533   -1.0684    0.0000 C   0  0  0  0  0  0  0  0  0  0  0  0
    1.8408   -1.7828    0.0000 C   0  0  0  0  0  0  0  0  0  0  0  0
    2.2533   -2.4973    0.0000 C   0  0  0  0  0  0  0  0  0  0  0  0
    1.8408   -3.2118    0.0000 C   0  0  0  0  0  0  0  0  0  0  0  0
    2.2533   -3.9262    0.0000 C   0  0  0  0  0  0  0  0  0  0  0  0
    2.6486    5.3429    0.0000 C   0  0  0  0  0  0  0  0  0  0  0  0
    4.0618    3.7487    0.0000 N   0  0  0  0  0  0  0  0  0  0  0  0
    3.6493    3.0342    0.0000 C   0  0  0  0  0  0  0  0  0  0  0  0
    4.0618    2.3198    0.0000 C   0  0  0  0  0  0  0  0  0  0  0  0
    2.8243    3.0342    0.0000 O   0  0  0  0  0  0  0  0  0  0  0  0
    3.6493    1.6053    0.0000 C   0  0  0  0  0  0  0  0  0  0  0  0
    4.0618    0.8908    0.0000 C   0  0  0  0  0  0  0  0  0  0  0  0
    2.8243    1.6053    0.0000 O   0  0  0  0  0  0  0  0  0  0  0  0
    3.6493    0.1764    0.0000 C   0  0  0  0  0  0  0  0  0  0  0  0
    4.0618   -0.5381    0.0000 C   0  0  0  0  0  0  0  0  0  0  0  0
    3.6493   -1.2526    0.0000 C   0  0  0  0  0  0  0  0  0  0  0  0
    4.0618   -1.9671    0.0000 C   0  0  0  0  0  0  0  0  0  0  0  0
    3.6493   -2.6815    0.0000 C   0  0  0  0  0  0  0  0  0  0  0  0
    4.0618   -3.3960    0.0000 C   0  0  0  0  0  0  0  0  0  0  0  0
    3.6493   -4.1105    0.0000 C   0  0  0  0  0  0  0  0  0  0  0  0
    4.0618   -4.8249    0.0000 C   0  0  0  0  0  0  0  0  0  0  0  0
    3.6493   -5.5394    0.0000 C   0  0  0  0  0  0  0  0  0  0  0  0
    4.0618   -6.2539    0.0000 C   0  0  0  0  0  0  0  0  0  0  0  0
    4.4412    3.4300    0.0000 O   0  0  0  0  0  0  0  0  0  0  0  0
    3.7268    3.0175    0.0000 P   0  0  0  0  0  0  0  0  0  0  0  0
    4.1393    2.3031    0.0000 O   0  0  0  0  0  0  0  0  0  0  0  0
    3.0123    2.6050    0.0000 O   0  0  0  0  0  0  0  0  0  0  0  0
    3.3143    3.7320    0.0000 O   0  0  0  0  0  0  0  0  0  0  0  0
   -2.5374    5.7382    0.0000 O   0  0  0  0  0  0  0  0  0  0  0  0
   -2.9499    6.4527    0.0000 P   0  0  0  0  0  0  0  0  0  0  0  0
   -3.6644    6.0402    0.0000 O   0  0  0  0  0  0  0  0  0  0  0  0
   -3.3624    7.1671    0.0000 O   0  0  0  0  0  0  0  0  0  0  0  0
   -2.2354    6.8652    0.0000 O   0  0  0  0  0  0  0  0  0  0  0  0
   -1.1353    6.1554    0.0000 C   0  0  0  0  0  0  0  0  0  0  0  0
   -1.7187    6.7388    0.0000 O   0  0  0  0  0  0  0  0  0  0  0  0
  4  5  1  0      
  5  6  1  0      
  6  1  1  0      
 10 11  1  0      
 11 12  1  0      
 12  7  1  0      
  4 13  1  0      
  2 14  1  0      
  7 15  1  0      
 14 16  1  0      
 16 17  1  0      
 17 18  1  0      
 18 19  1  0      
 18 20  1  0      
 16 21  2  0      
 19 22  1  0      
 22 23  1  0      
 23 24  1  0      
 24 25  1  0      
 25 26  1  0      
 26 27  1  0      
 27 28  1  0      
 28 29  1  0      
 20 30  1  0      
 30 31  1  0      
 31 32  1  0      
 32 33  1  0      
 33 34  1  0      
 34 35  1  0      
 35 36  1  0      
 36 37  1  0      
 30 38  2  0      
 37 39  1  0      
 39 40  1  0      
 40 41  1  0      
 41 42  1  0      
  3 43  1  0      
 43 44  1  0      
 44 45  1  0      
 44 46  2  0      
 45 47  1  0      
 47 48  1  0      
 47 49  1  0      
 48 50  1  0      
 50 51  1  0      
 51 52  1  0      
 52 53  1  0      
 53 54  1  0      
 54 55  1  0      
 55 56  1  0      
 56 57  1  0      
 57 58  1  0      
 58 59  1  0      
 49 60  1  0      
 60 61  1  0      
 60 62  2  0      
 61 63  1  0      
 63 64  1  0      
 64 65  1  0      
 65 66  1  0      
 66 67  1  0      
 67 68  1  0      
 68 69  1  0      
 69 70  1  0      
 70 71  1  0      
 71 72  1  0      
 72 73  1  0      
 73 74  1  0      
  8 75  1  0      
 75 76  1  0      
 76 77  1  0      
 77 78  1  0      
 78 79  1  0      
 79 80  1  0      
 80 81  1  0      
 81 82  1  0      
 76 83  2  0      
 78 84  1  0      
 82 85  1  0      
 85 86  1  0      
 86 87  1  0      
 87 88  1  0      
 88 89  1  0      
 12 90  1  0      
 13 90  1  0      
  9 91  1  0      
 91 92  1  0      
 92 93  1  0      
 92 94  2  0      
 93 95  1  0      
 95 96  1  0      
 95 97  1  0      
 96 98  1  0      
 98 99  1  0      
 99100  1  0      
100101  1  0      
101102  1  0      
102103  1  0      
103104  1  0      
104105  1  0      
105106  1  0      
106107  1  0      
  1  2  1  1      
  3  2  1  1      
  4  3  1  1      
  7  8  1  1      
  9  8  1  1      
 10  9  1  1      
 10108  1  0      
108109  1  0      
109110  2  0      
109111  1  0      
109112  1  0      
  1113  1  0      
113114  1  0      
114115  2  0      
114116  1  0      
114117  1  0      
  6118  1  0      
118119  1  0      
M  STY  1   1 SUP
M  SLB  1   1   1
M  SAL   1  5 108 109 110 111 112
M  SBL   1  1 109
M  SMT   1 OPO3H2
M  SBV   1109   -6.9258    7.5257
M  STY  1   2 SUP
M  SLB  1   2   2
M  SAL   2  5 113 114 115 116 117
M  SBL   2  1 114
M  SMT   2 OPO3H2
M  SBV   2114   -7.8788    8.1088
M  STY  1   3 SUP
M  SLB  1   3   3
M  SAL   3  2 118 119
M  SBL   3  1 119
M  SMT   3 CH2OH
M  SBV   3119   -7.2699    8.7351
M  END
